# Supplementary material
Source: bioRxiv or medRxiv preprint supplement (https://medrxiv.org/content/medrxiv/early/2021/09/07/2021.09.02.21262599/DC3/embed/media-3.pdf)
Supplement: Supplementary file [file media-3.pdf]

**Supplemental Table 3 - Comparison of blood biochemistry at admission for the whole cohort and study cohort**

| Biochemical Parameter             | Full Cohort (N = 1063) | Study Cohort (N = 168) | Difference <sup>#</sup>      | P-value       |
|-----------------------------------|------------------------|------------------------|------------------------------|---------------|
| WBC count (x10 <sup>3</sup> / μL) | 7.9 (5.4-11.1)         | 7.4 (5.2-10.3)         | 0.49 [95% CI -0.11 to 1.1]   | 0.1178        |
| CRP (mg/l)                        | 78.9 (37.4-135.4)      | 81.3 (30.7-138.4)      | 2.3 [95% CI -9.9 to 10.2]    | 0.9590        |
| LDH (U/l)                         | 411 (304-573)          | 364 (282-496)          | 47.5 [95% CI 7.5 to 64.0]    | <b>0.0133</b> |
| RBC count (x10 <sup>5</sup> / μL) | 4.6 ± 0.6              | 4.6 ± 0.6              | -0.04 [95% CI -0.1 to 0.06]  | 0.4447        |
| Neutrophils %                     | 80.9 ± 11.2            | 80.0 ± 10.6            | 1.7 [95% CI -0.3 to 2.7]     | 0.1194        |
| Lymphocytes %                     | 10.6 (6.4-16.7)        | 12.3 (7.3-16.9)        | -1.7 [95% CI -2.0 to 0.2]    | 0.1185        |
| NLR                               | 8.3 (4.8-15.1)         | 6.8 (5.1-13.2)         | 1.5 [95% CI -0.3 to 1.6]     | 0.1673        |
| PLT (x10 <sup>3</sup> / μL)       | 218 (171-290)          | 206 (166-281)          | 12 [95% CI -6 to 21]         | 0.2949        |
| Monocytes %                       | 5.1 (3.4-7.3)          | 5.3 (3.7-7.4)          | -0.2 [95% CI -0.7 to 0.2]    | 0.2626        |
| ALT (U/l)                         | 53 (35-83)             | 53 (37-82)             | 0.25 [95% CI -6 to 4]        | 0.8362        |
| AST (U/l)                         | 47 (34-67)             | 45 (33-65)             | 2.0 [95% CI -2.5 to 5]       | 0.5398        |
| Basophils, %                      | 0.15 (0.10 - 0.22)     | 0.17 (0.10-0.23)       | -0.02 [95% CI -0.01 to 0.01] | 0.7467        |
| Eosinophil, %                     | 0.10 (0.04 - 0.28)     | 0.10 (0.02-0.26)       | 0.0 [95% CI -0.01 to 0.02]   | 0.7399        |
| Haemoglobin (g/dl)                | 13.4 (12.3 - 14.4)     | 13.6 (12.4-14.5)       | -0.2 [95% CI -0.4 to 0.2]    | 0.4401        |
| D-dimer (ng/mL)                   | 975 (518-2163)         | 943 (549-1833)         | 33 [95% CI -105 to 145]      | 0.7435        |
| Haematocrit                       | 39.0 (36.0 - 41.6)     | 39.2 (36.1-41.9)       | -0.2 [95% CI -0.9 to -0.5]   | 0.5740        |
| Fibrinogen (g/l)                  | 4.7 (3.5 - 6.9)        | 4.9 (3.5-7.1)          | -0.2 [95% CI -0.4 to 0.1]    | 0.2890        |
| Ferritin (ng/ml)                  | 901 (431 - 1650)       | 863 (401-1631)         | 38 [95% CI -21 to 42]        | 0.7840        |
| IL-6 (pg/ml)                      | 18.8 (6.8- 40.9)       | 19.5 (6.8-41.4)        | -0.6 [95% CI -3.3 to 2.6]    | 0.8854        |
| SII                               | 1926 (908 - 3761)      | 1577 (790-3303)        | 349 [95% CI -39 to 437]      | 0.1060        |
| Urea (mmol/L)                     | 5.9 (4.3 - 8.0)        | 5.6 (4.1-7.4)          | 0.3 [95% CI -0.1 to 0.8]     | 0.1380        |
| Creatinine (μmol/L)               | 80.4 (67.3 - 96.2)     | 80.1 (66.1-94.0)       | -1.0 [95% CI -2.3 to 4.7]    | 0.5104        |

Data are presented as median (interquartile range) or mean ± (standard deviation). #Differences shown are mean or median differences + 95% confidence interval.

CRP, C-reactive protein; IL6, interleukin-6; ALT, alanine aminotransferase; AST, aspartate aminotransferase, LDH, lactate dehydrogenase, WBC, white blood cell count; RBC, red blood cell; SII, systemic immune-inflammation index; NLR, neutrophil-to-lymphocyte ratio.
